# Supplementary material for: Ligand-dependent structural diversity and optimizable CO2chemical fixation activities of Cu-doped polyoxo-titanium clusters
Source: Royal Society of Chemistry journal article supplement (doi:10.1039/d3dt01718d), 2023-01-01
Supplement: d3dt01718d1.pdf [file d3dt01718d1.pdf]

*Supporting Information*

**Ligands dependent structural diversity and optimizable CO<sub>2</sub>  
chemical fixation activities of Cu-doped polyoxo-titanium  
clusters**

Xin Lin,<sup>a, b</sup> Ying-Hua Yu,<sup>a, b</sup> Guang-Hui Chen,<sup>a</sup> Qiao-Hong Li,<sup>\*a</sup> Lei Zhang,<sup>\*a</sup>  
and Jian Zhang<sup>\*a</sup>

<sup>a</sup> State Key Laboratory of Structural Chemistry, Fujian Institute of Research on the Structure of Matter, the Chinese Academy of Sciences, Fuzhou, Fujian 350002, P. R. China. E-mail: [lqh2382@fjirsm.ac.cn](mailto:lqh2382@fjirsm.ac.cn); [LZhang@fjirsm.ac.cn](mailto:LZhang@fjirsm.ac.cn); [zhj@fjirsm.ac.cn](mailto:zhj@fjirsm.ac.cn)

<sup>b</sup> University of Chinese Academy of Sciences, Beijing 100049, China

# 1. Single crystal structure of PTC-367 to PTC-370

## 1.1. Structure determination of PTC-367 to PTC-370.

**Table S1** Crystal data and structure refinement summary for **PTC-367** to **PTC-370**.

|                                          | <b>PTC-367</b>                                                                   | <b>PTC-368</b>                                                                                   | <b>PTC-369</b>                                                                    | <b>PTC-370</b>                                                                     |
|------------------------------------------|----------------------------------------------------------------------------------|--------------------------------------------------------------------------------------------------|-----------------------------------------------------------------------------------|------------------------------------------------------------------------------------|
| CCDC No                                  | 2264421                                                                          | 2264422                                                                                          | 2264423                                                                           | 2264424                                                                            |
| Formula                                  | C <sub>52</sub> H <sub>116</sub> Cu <sub>3</sub> O <sub>29</sub> Ti <sub>6</sub> | C <sub>60</sub> H <sub>116</sub> Br <sub>2</sub> Cu <sub>2</sub> O <sub>34</sub> Ti <sub>8</sub> | C <sub>70</sub> H <sub>150</sub> Cu <sub>3</sub> O <sub>57</sub> Ti <sub>16</sub> | C <sub>91</sub> H <sub>179</sub> Cu <sub>3</sub> O <sub>101</sub> Ti <sub>29</sub> |
| Mr                                       | 1683.46                                                                          | 1026.82                                                                                          | 2861.42                                                                           | 4470.06                                                                            |
| T[K]                                     | 290                                                                              | 293                                                                                              | 100                                                                               | 100                                                                                |
| Crystal system                           | Triclinic                                                                        | Monoclinic                                                                                       | Monoclinic                                                                        | Monoclinic                                                                         |
| Space group                              | <i>P</i> -1                                                                      | <i>P</i> 2 <sub>1</sub> / <i>n</i>                                                               | <i>P</i> 2 <sub>1</sub> / <i>c</i>                                                | <i>P</i> 2 <sub>1</sub> / <i>n</i>                                                 |
| a [Å]                                    | 12.9989 (3)                                                                      | 11.6608 (2)                                                                                      | 16.0885 (4)                                                                       | 24.5562 (14)                                                                       |
| b [Å]                                    | 14.2479 (3)                                                                      | 19.3473 (4)                                                                                      | 44.2441 (8)                                                                       | 29.6251 (15)                                                                       |
| c [Å]                                    | 23.6414 (3)                                                                      | 20.8404 (3)                                                                                      | 33.1200 (4)                                                                       | 30.6831 (17)                                                                       |
| α [Å]                                    | 87.179 (2)                                                                       | 90                                                                                               | 90                                                                                | 90                                                                                 |
| β [Å]                                    | 82.799 (2)                                                                       | 91.041 (2)                                                                                       | 94.1550 (15)                                                                      | 111.029                                                                            |
| γ [Å]                                    | 72.186 (2)                                                                       | 90                                                                                               | 90                                                                                | 90                                                                                 |
| V [Å <sup>3</sup> ]                      | 4135.47 (15)                                                                     | 4700.92 (14)                                                                                     | 23513.5 (7)                                                                       | 20835 (2)                                                                          |
| Z                                        | 2                                                                                | 4                                                                                                | 8                                                                                 | 4                                                                                  |
| ρ <sub>c</sub> [gcm <sup>-3</sup> ]      | 1.352                                                                            | 1.451                                                                                            | 1.617                                                                             | 1.425                                                                              |
| μ [mm <sup>-1</sup> ]                    | 7.43                                                                             | 6.97                                                                                             | 8.91                                                                              | 7.76                                                                               |
| Radiation                                | Ga Kα                                                                            | Ga Kα                                                                                            | Ga Kα                                                                             | Ga Kα                                                                              |
| GOOF                                     | 1.042                                                                            | 1.063                                                                                            | 1.016                                                                             | 0.999                                                                              |
| R <sub>1</sub> [I>2σ(I)] <sup>[a]</sup>  | 0.084                                                                            | 0.087                                                                                            | 0.091                                                                             | 0.096                                                                              |
| wR <sub>2</sub> [I>2σ(I)] <sup>[b]</sup> | 0.224                                                                            | 0.279                                                                                            | 0.277                                                                             | 0.344                                                                              |

[a]  $R_1 = \sum ||F_o| - |F_c|| / \sum |F_o|$ .

[b]  $wR_2 = \{ \sum [w(F_o^2 - F_c^2)^2] / \sum [w(F_o^2)^2] \}^{1/2}$

---

## 1.2. Single crystal structures and packing mode of PTC-367 to PTC-370.

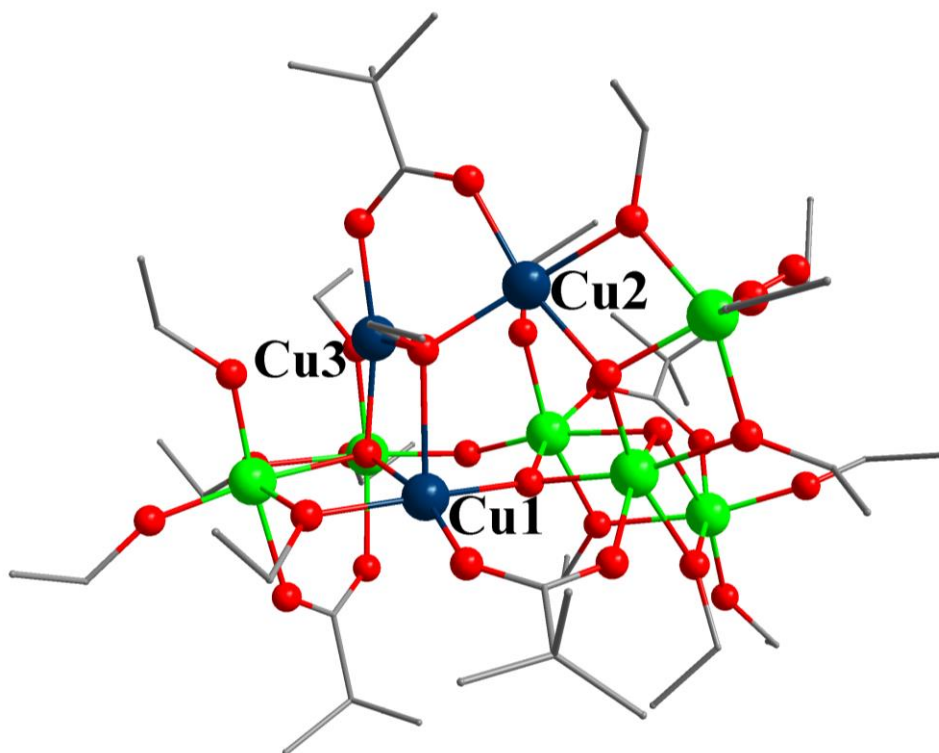

**Figure S1.** The structure of PTC-367. H atoms were omitted for clarity. Atom color code: green Ti; Blue Cu; red O; gray C. Omit H for clarity.

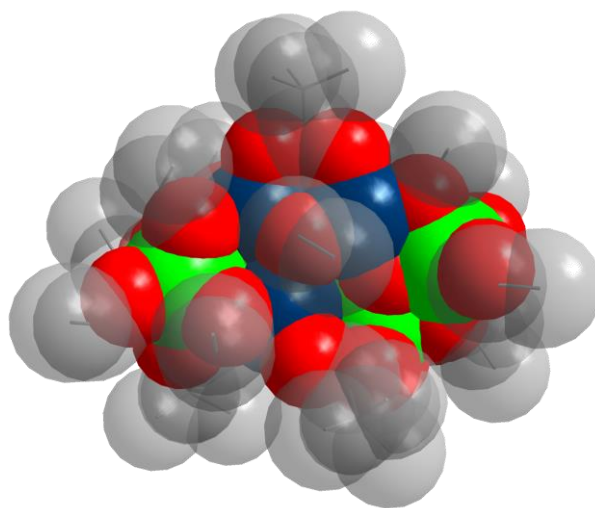

**Figure S2** Space-filling model of the structure of PTC-367. Atom color code: green Ti; Blue Cu; red O; gray C. Omit H for clarity.

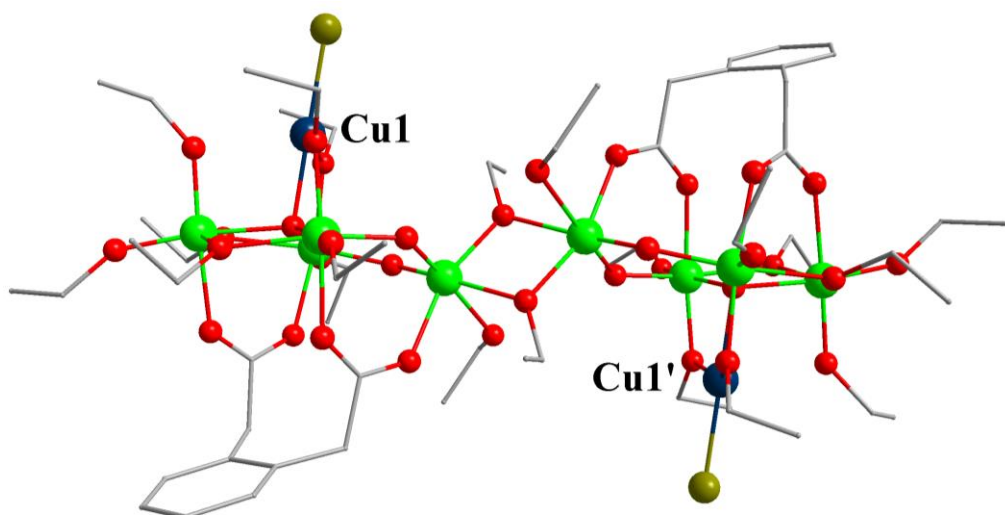

**Figure S3** The structure of **PTC-368**. H atoms were omitted for clarity. Atom color code: green Ti; Blue Cu; red O; gray C; brown Br. Omit H for clarity.

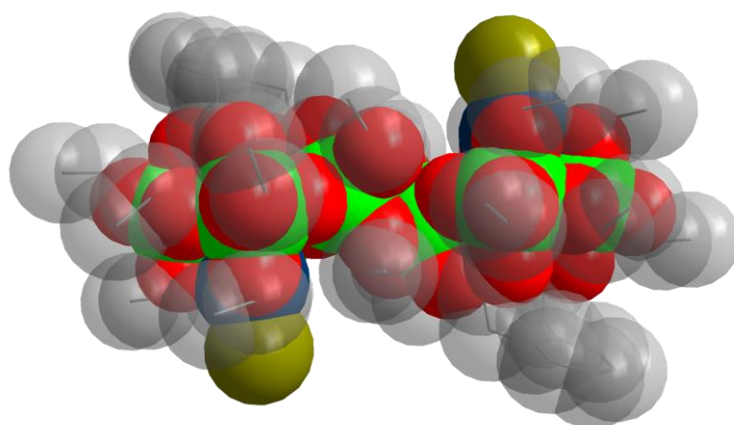

**Figure S4** Space-filling model of the structure of **PTC-368**. Atom color code: green Ti; Blue Cu; red O; gray C; brown Br. Omit H for clarity.

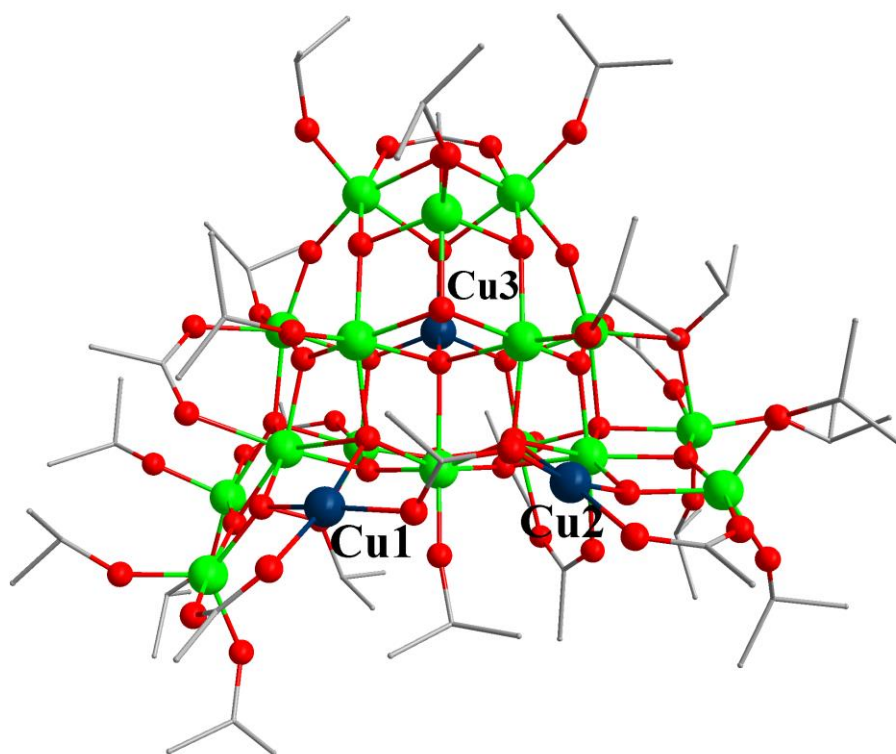

**Figure S5** The structure of **PTC-369**. H atoms were omitted for clarity. Atom color code: green Ti; Blue Cu; red O; gray C. Omit H for clarity.

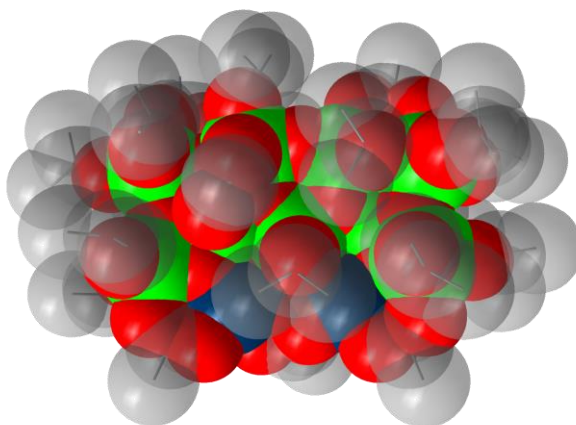

**Figure S6** Space-filling model of the structure of **PTC-369**. Atom color code: green Ti; Blue Cu; red O; gray C. Omit H for clarity.

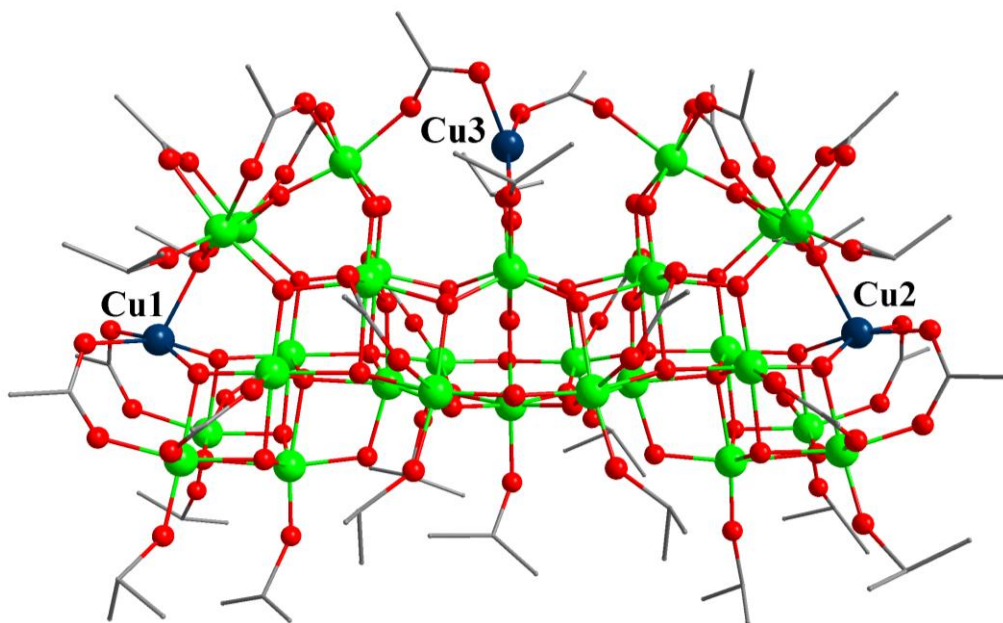

**Figure S7** The structure of **PTC-370** H atoms were omitted for clarity. Atom color code: green Ti; Blue Cu; red O; gray C. Omit H for clarity.

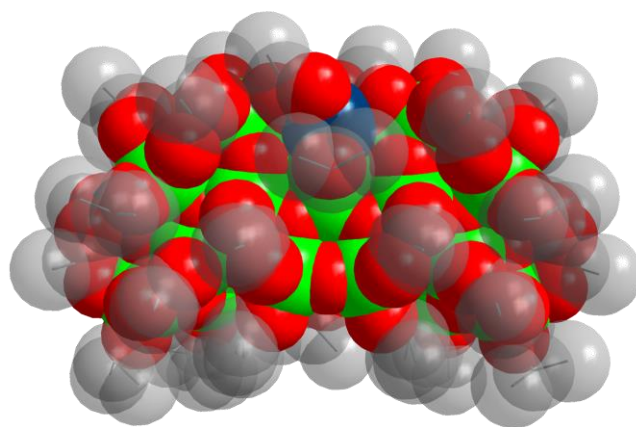

**Figure S8** Space-filling model of the structure of **PTC-370**. Atom color code: green Ti; Blue Cu; red O; gray C. Omit H for clarity.

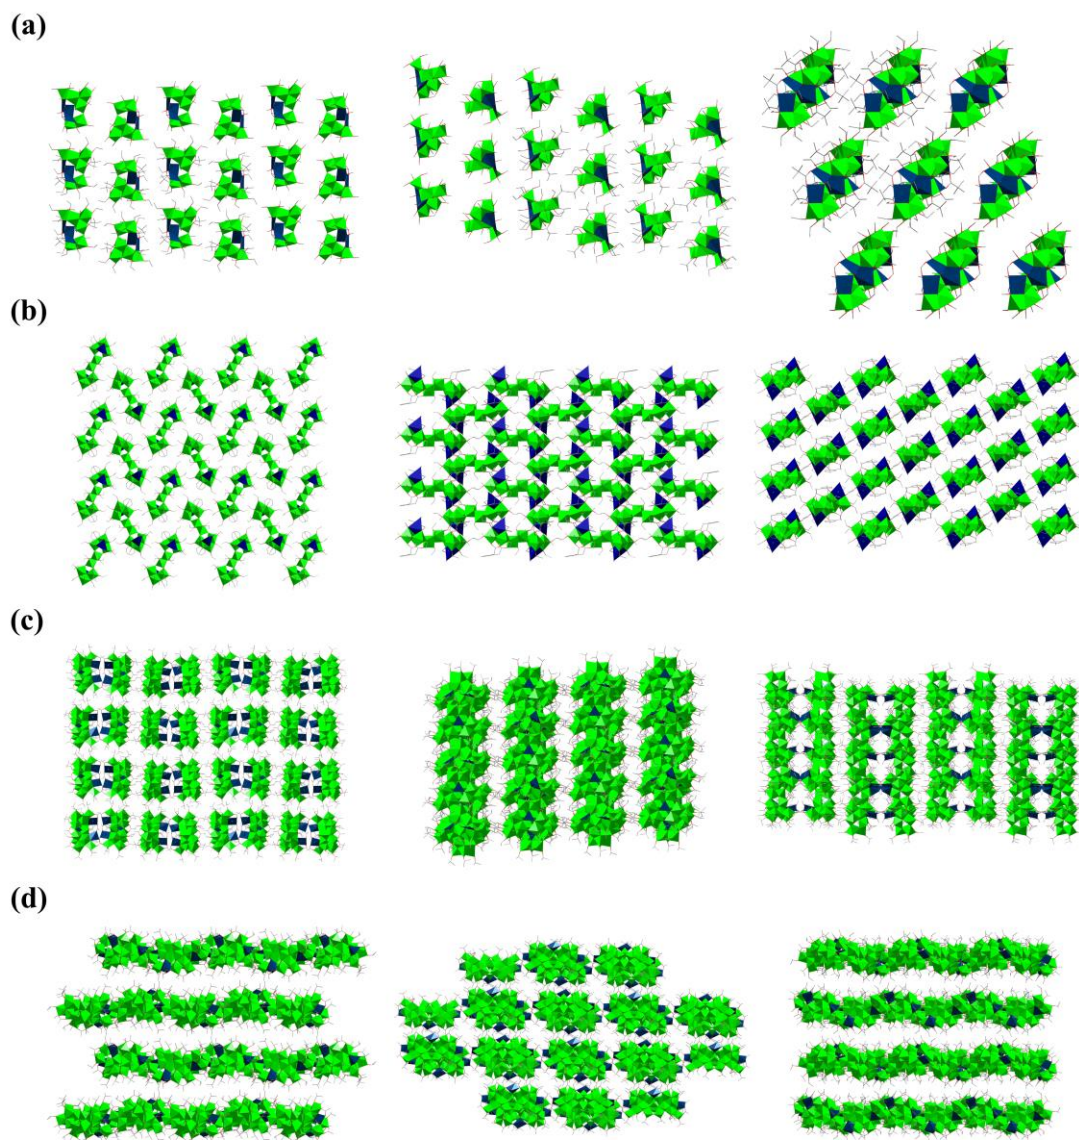

**Figure S 9** The packing view of (a) PTC-367 to (d) PTC-370 along the a-, c- and b- axis. Color codes: green Ti; green, Cu; gray C; red O; brown Br. Omit H for clarity.

### 1.3. Metal coordination mode of PTC-367 to PTC-370.

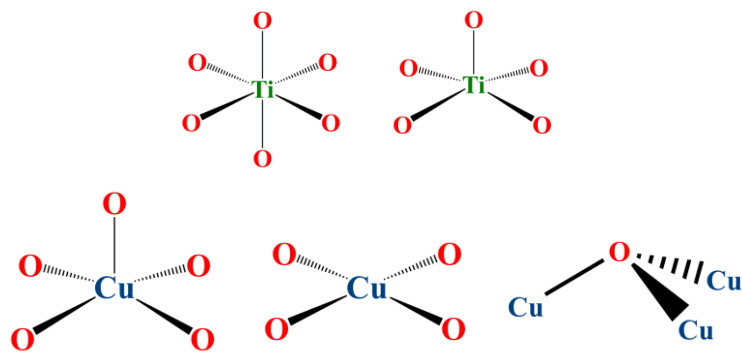

**Figure S10** The  $\text{Ti}^{4+}$  and  $\text{Cu}^{2+}$  coordination mode and the spatial configuration between  $\text{Cu}^{2+}$  ions of PTC-367.

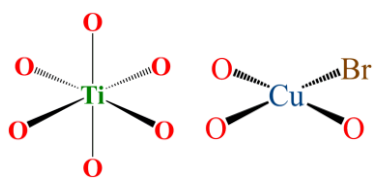

**Figure S11** The  $\text{Ti}^{4+}$  and  $\text{Cu}^{2+}$  coordination mode of **PTC-368**.

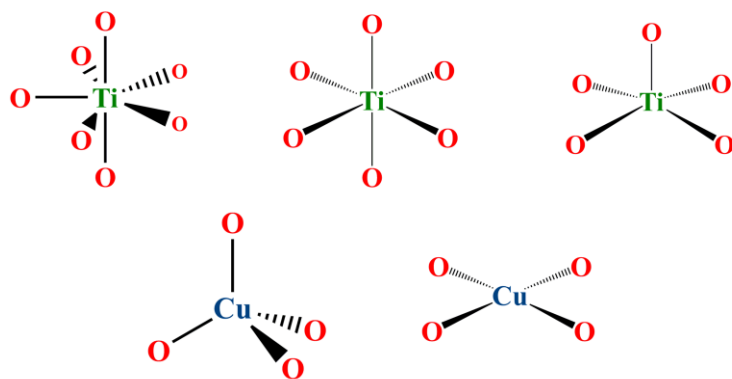

**Figure S12** The  $\text{Ti}^{4+}$  and  $\text{Cu}^{2+}$  coordination mode of **PTC-369**.

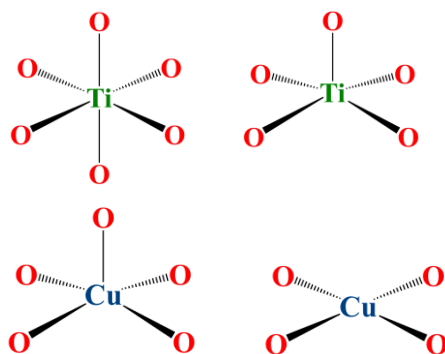

**Figure S13** The a)  $\text{Ti}^{4+}$  and b)  $\text{Cu}^{2+}$  coordination mode of **PTC-370**.



---

## 2. Basic characterization of PTC-367 to PTC-370

### 2.1. PXRD patterns of PTC-367 to PTC-370.

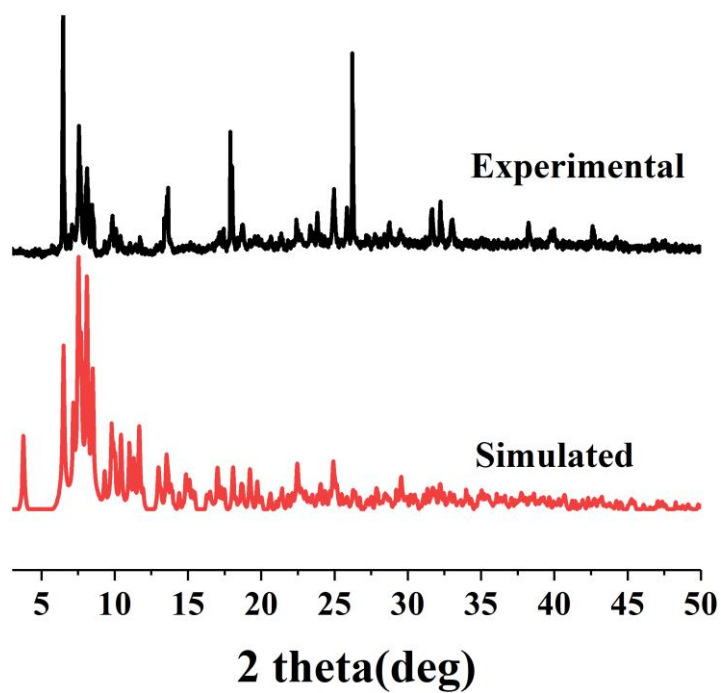

Figure S14 Normalized PXRD pattern of PTC-367.

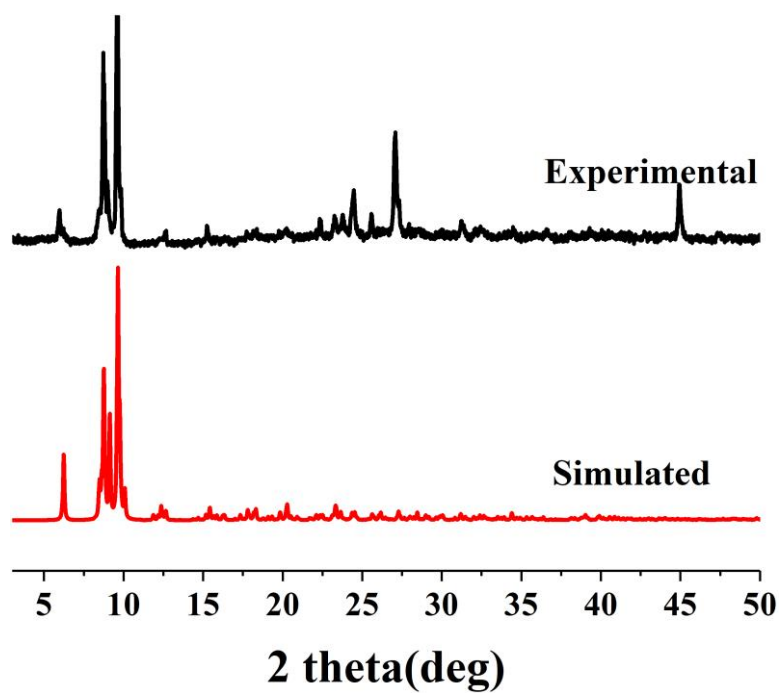

Figure S15 Normalized PXRD pattern of PTC-368.

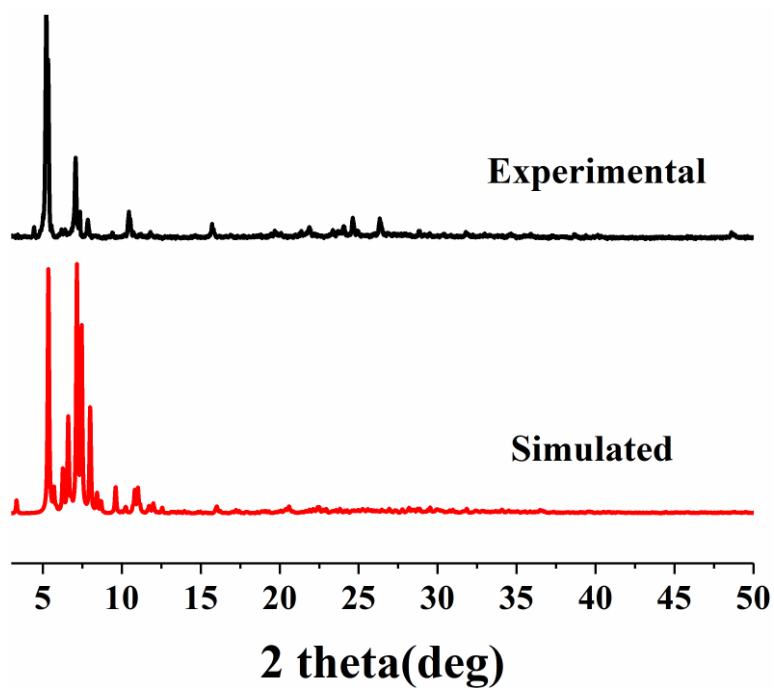

Figure S16 Normalized PXRD pattern of PTC-369.

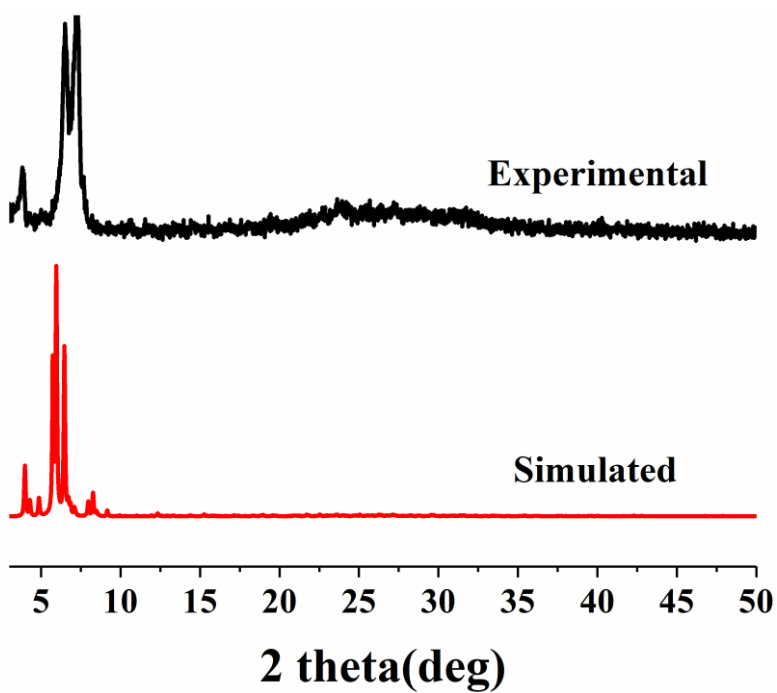

Figure S17 Normalized PXRD pattern of PTC-370.

---

2.2. TGA curves of PTC-367 to PTC-370.

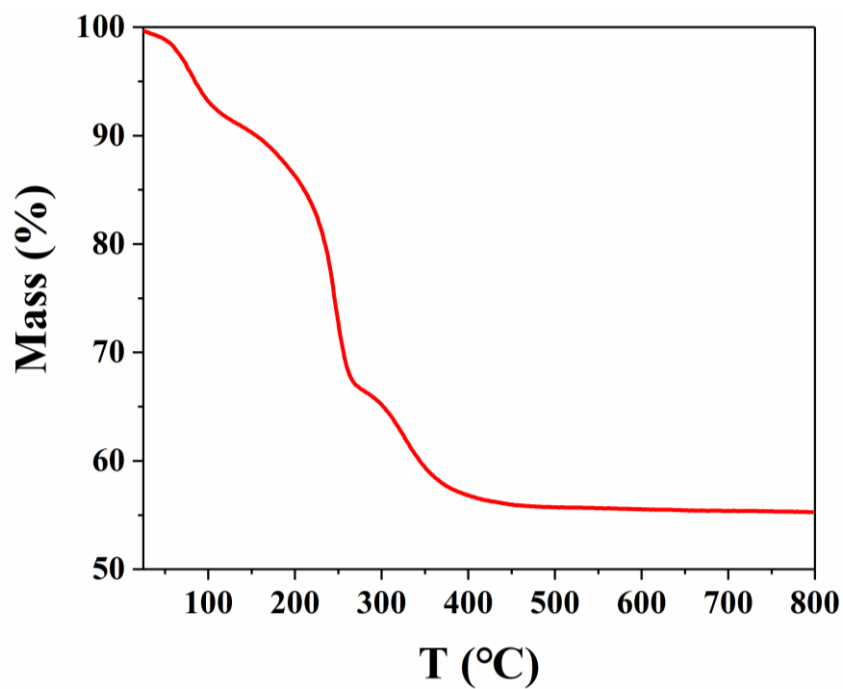

Figure S18 The TGA curve of PTC-367.

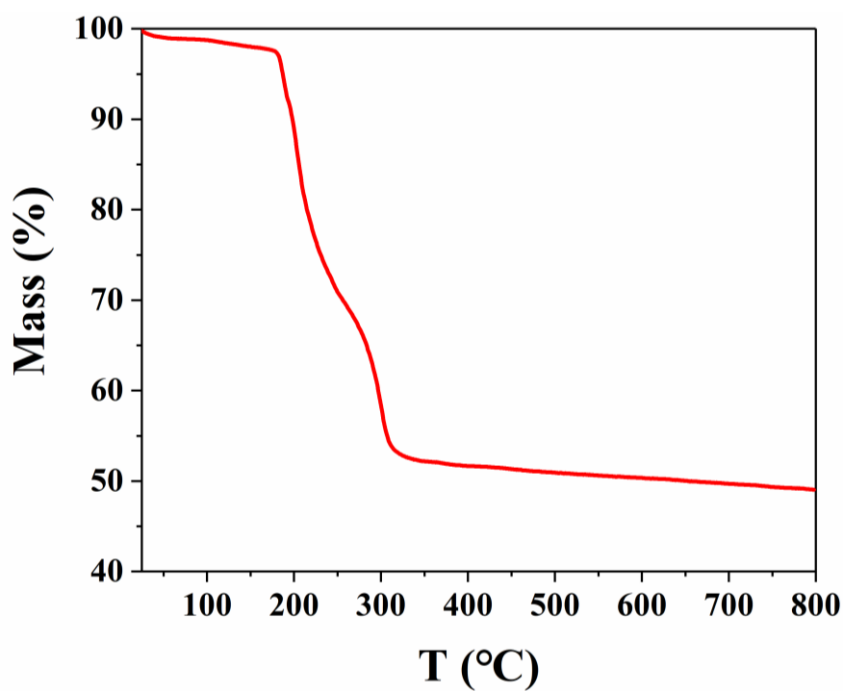

Figure S19 The TGA curve of PTC-368.

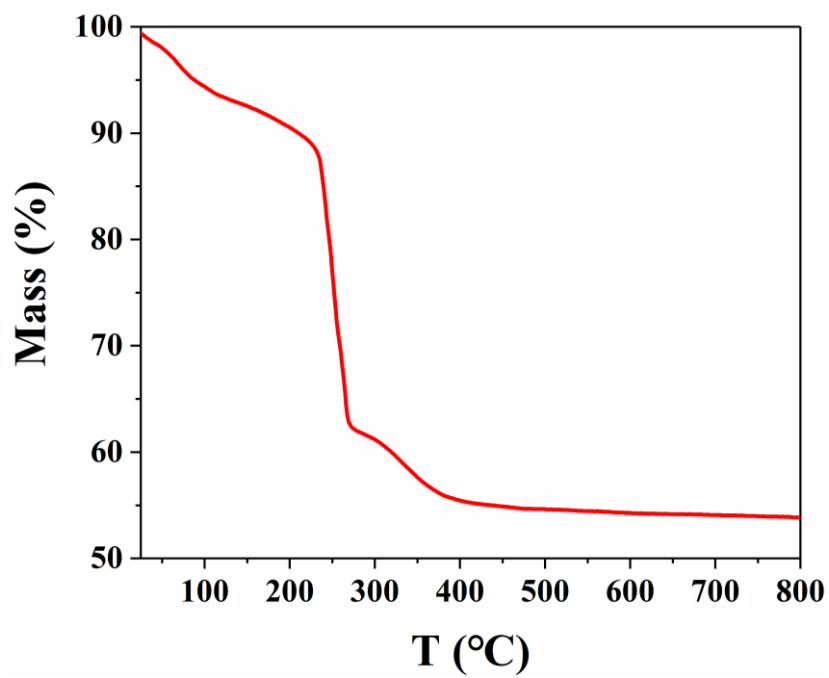

**Figure S20** The TGA curve of PTC-369.

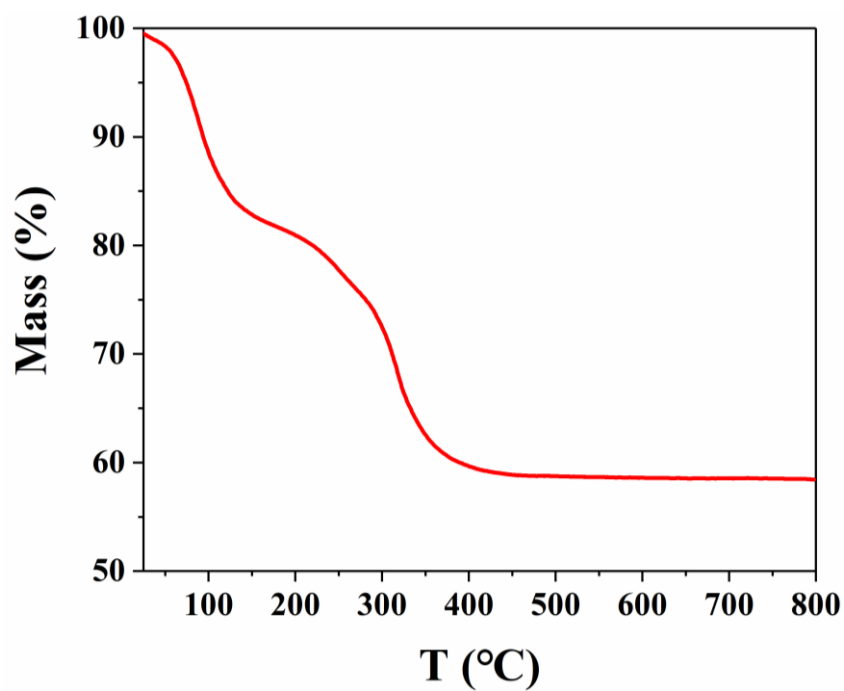

**Figure S21** The TGA curve of PTC-370.

### 2.3. Solid UV-vis spectra and Bandgap.

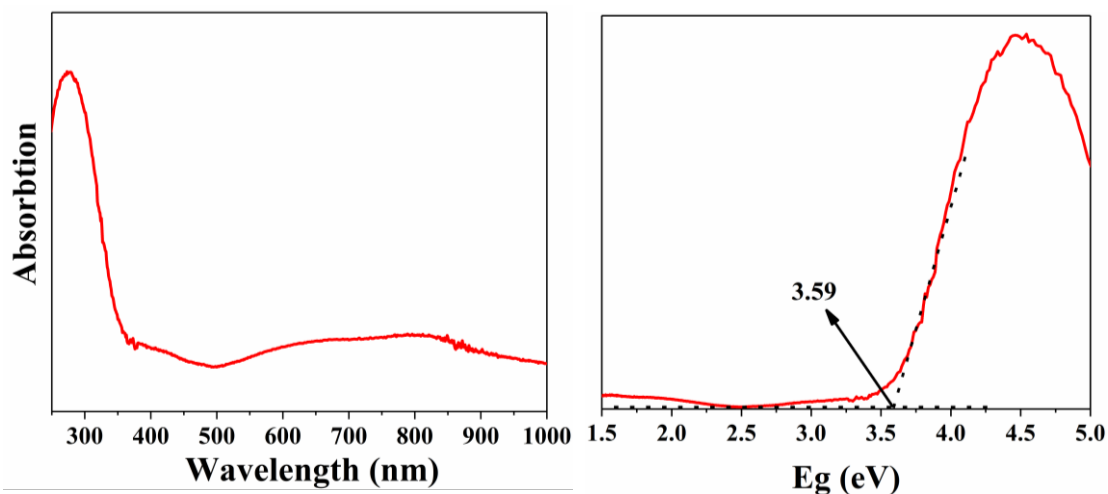

Figure S22 The normalized solid-state UV-vis spectrum and Bandgap of PTC-367.

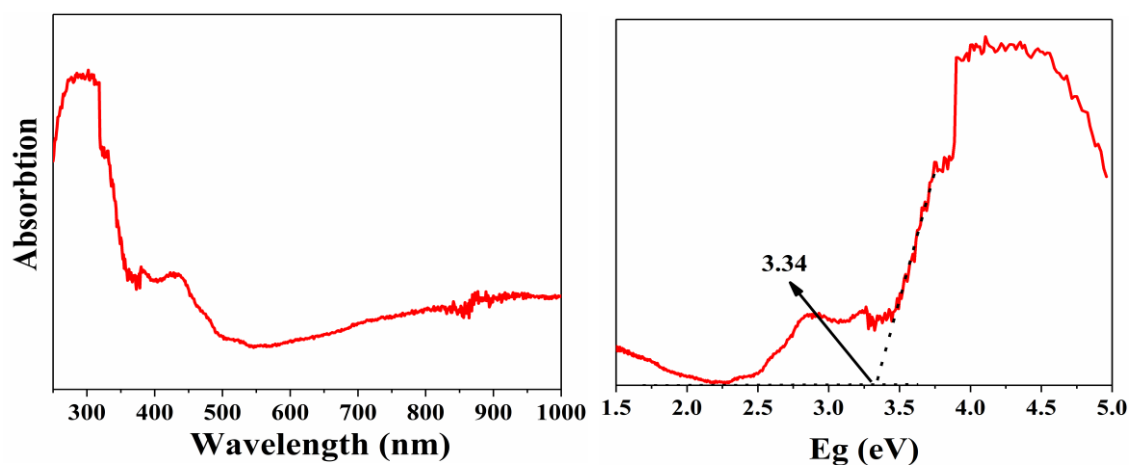

Figure S23 The normalized solid-state UV-vis spectrum and Bandgap of PTC-368.

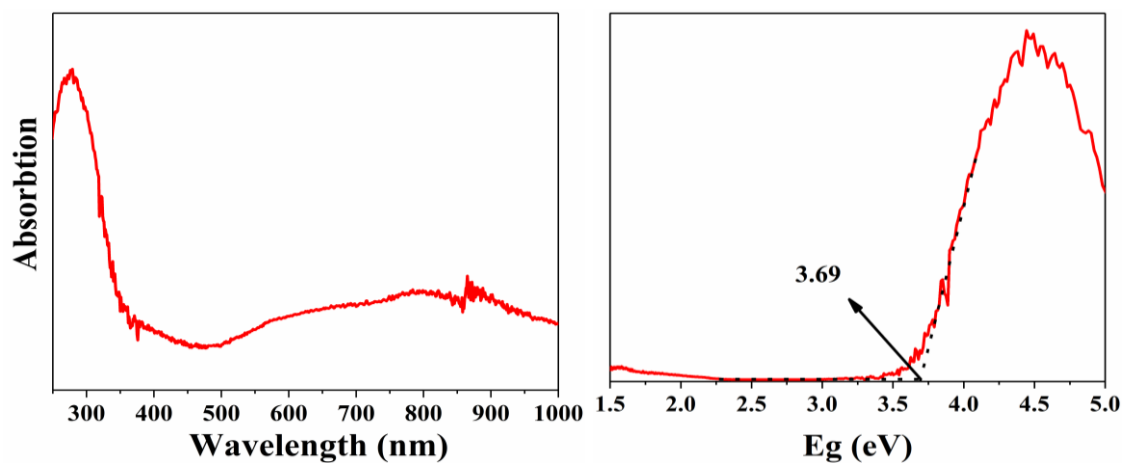

Figure S24 The normalized solid-state UV-vis spectrum and Bandgap of PTC-369.

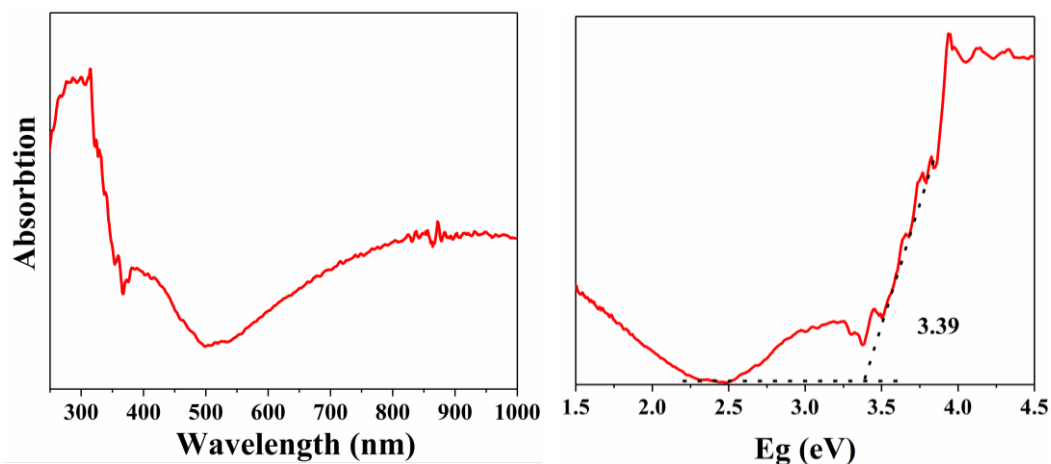

**Figure S25** The normalized solid-state UV-vis spectrum and Bandgap of PTC-370.

## 2.4 Energy dispersive spectrometer

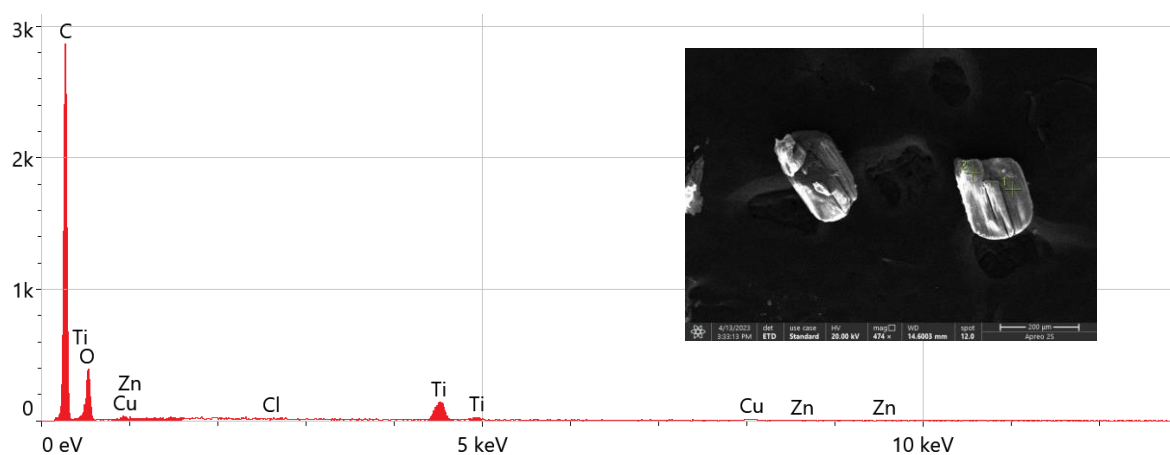

**Figure S26** The EDS results of PTC-367.

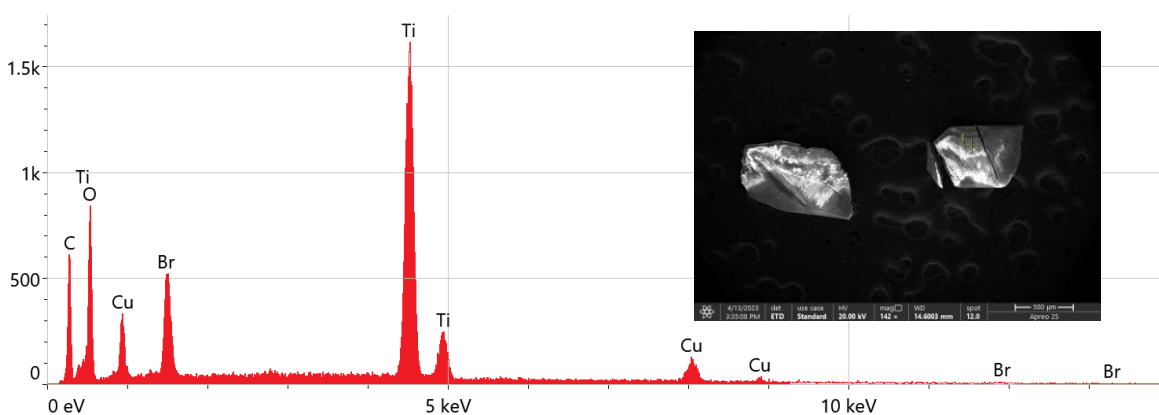

**Figure S27** The EDS results of PTC-368.

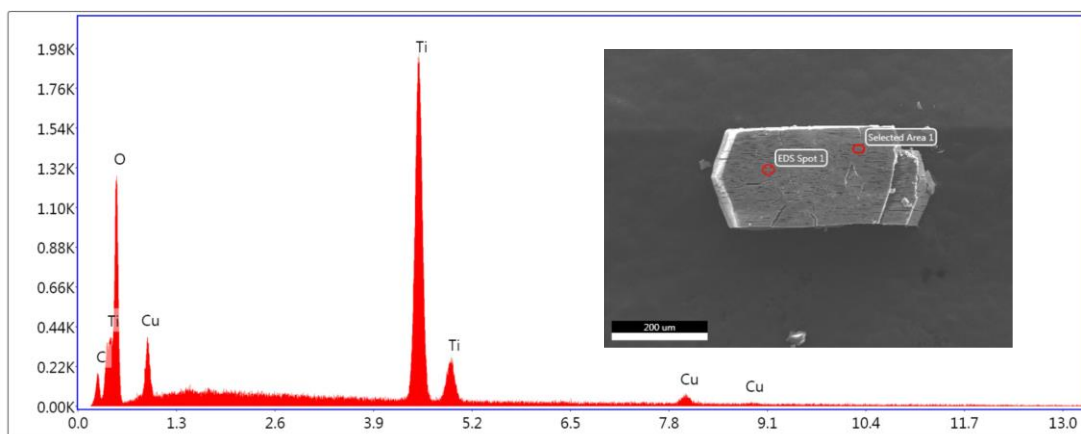

Lsec: 18.4 0 Cnts 0.000 keV Det: Octane Plus Det

**Figure S28** The EDS results of PTC-369.

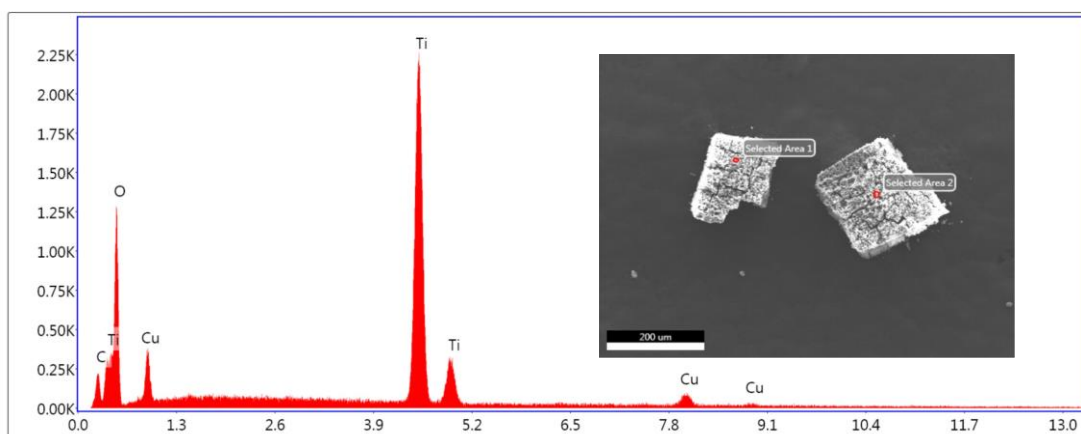

Lsec: 15.9 0 Cnts 0.000 keV Det: Octane Plus Det

**Figure S29** The EDS results of PTC-370

### 3. The summary of ICP-AES results

**Table S2** The ICP-AES results of PTC-367 to PTC-370.

|                | Ti (wt%) | Cu (wt%) | Ti: Cu | Calculated (Ti:Cu) |
|----------------|----------|----------|--------|--------------------|
| <b>PTC-367</b> | 17.56    | 13.87    | 1.68   | 2.00               |
| <b>PTC-368</b> | 18.45    | 6.03     | 4.06   | 4.00               |
| <b>PTC-369</b> | 30.67    | 7.77     | 5.24   | 5.33               |
| <b>PTC-370</b> | 33.25    | 4.91     | 8.99   | 9.67               |

### 4. Bond valence sum calculation

**Table S3** Bond valence sum (BVS) analysis of metal ions and  $\mu$ -O for PTC-367 to

**PTC-370.**

| <b>PTC-367</b> |        |      |        |      |        |
|----------------|--------|------|--------|------|--------|
| Ti1            | +4.178 | Ti2  | +4.316 | Ti3  | +4.204 |
| Ti4            | 4.347  | Ti5  | +4.369 | Ti6  | +4.327 |
| Cu1            | +2.071 | Cu2  | +1.928 | Cu3  | +1.928 |
| O1             | -2.154 | O4   | -2.076 | O6   | -2.023 |
| O7             | -2.040 | O8   | 2.041  |      |        |
| <b>PTC-368</b> |        |      |        |      |        |
| Ti1            | +4.299 | Ti2  | +4.369 | Ti3  | +4.334 |
| Ti4            | +4.278 | Cu1  | +2.157 |      |        |
| O2             | -2.174 | O3   | -1.975 | O4   | -1.992 |
| <b>PTC-369</b> |        |      |        |      |        |
| Ti1            | +4.217 | Ti2  | +4.211 | Ti3  | +4.200 |
| Ti4            | +4.179 | Ti5  | +4.157 | Ti6  | +4.242 |
| Ti7            | +4.201 | Ti8  | +4.289 | Ti9  | +4.331 |
| Ti10           | +4.256 | Ti11 | +3.992 | Ti12 | +4.077 |
| Ti13           | +4.283 | Ti14 | +4.313 | Ti15 | +4.347 |
| Ti16           | +4.369 |      |        |      |        |
| Cu1            | +1.918 | Cu2  | +1.910 | Cu3  | +2.849 |
| O1             | -2.115 | O2   | -1.680 | O4   | -1.962 |
| O5             | -1.972 | O6   | -1.824 | O7   | -2.086 |
| O8             | -1.707 | O10  | -1.795 | O12  | -1.855 |
| O15            | -2.053 | O17  | -2.067 | O18  | -2.100 |
| O19            | -2.058 | O20  | -2.052 | O22  | -1.974 |
| O24            | -1.832 | O26  | -2.022 | O27  | -2.092 |
| O29            | -2.109 | O32  | -1.957 | O35  | -2.128 |
| O37            | -2.136 | O42  | -2.094 |      |        |
| <b>PTC-370</b> |        |      |        |      |        |
| Ti1            | +4.009 | Ti2  | +4.030 | Ti3  | +4.160 |



|      |        |      |        |      |        |
|------|--------|------|--------|------|--------|
| Ti4  | +3.925 | Ti5  | +4.211 | Ti6  | +4.189 |
| Ti7  | +3.918 | Ti8  | +4.108 | Ti9  | +4.367 |
| Ti10 | +4.028 | Ti11 | +4.232 | Ti12 | +4.139 |
| Ti13 | +4.198 | Ti14 | +4.146 | Ti15 | +4.257 |
| Ti16 | +4.195 | Ti17 | +4.160 | Ti18 | +4.100 |
| Ti19 | +4.244 | Ti20 | +4.159 | Ti21 | +4.206 |
| Ti22 | +4.284 | Ti23 | +4.191 | Ti24 | +4.200 |
| Ti25 | +4.272 | Ti26 | +4.327 | Ti27 | +4.184 |
| Ti28 | +4.291 | Ti29 | +4.268 |      |        |
| Cu1  | +1.966 | Cu2  | +2.024 | Cu3  | +1.994 |
| O1   | -2.073 | O2   | -2.059 | O3   | -2.197 |
| O4   | -2.118 | O5   | -2.054 | O6   | -2.183 |
| O7   | -2.021 | O8   | -2.031 | O9   | -2.038 |
| O10  | -1.893 | O11  | -1.966 | O12  | -1.892 |
| O13  | -1.885 | O14  | -1.916 | O15  | -2.233 |
| O16  | -2.154 | O17  | -2.073 | O18  | -2.081 |
| O19  | -2.187 | O20  | -2.056 | O21  | -2.113 |
| O22  | -1.588 | O23  | -2.002 | O24  | -2.065 |
| O25  | -1.955 | O26  | -2.232 | O27  | -2.127 |
| O28  | -1.891 | O30  | -1.925 | O31  | -2.048 |
| O33  | -1.963 | O34  | -2.058 | O40  | -1.945 |
| O41  | -1.937 | O43  | -2.024 | O44  | -1.967 |
| O45  | -2.120 | O46  | -1.628 | O47  | -1.858 |
| O56  | -2.065 | O60  | -1.953 | O68  | -2.002 |
| O77  | -1.957 | O88  | -2.037 |      |        |

## 5. CO<sub>2</sub> cycloaddition reaction

Reaction conditions: epichlorohydrin (10 mmol), catalysts (0.005 mmol), <sup>n</sup>Bu<sub>4</sub>NBr (1 mmol), room temperature, 24 h, CO<sub>2</sub> (1 atm gauge pressure). <sup>[b]</sup> <sup>1</sup>H NMR yields with CH<sub>2</sub>Br<sub>2</sub> (1 mmol) as the internal standard.

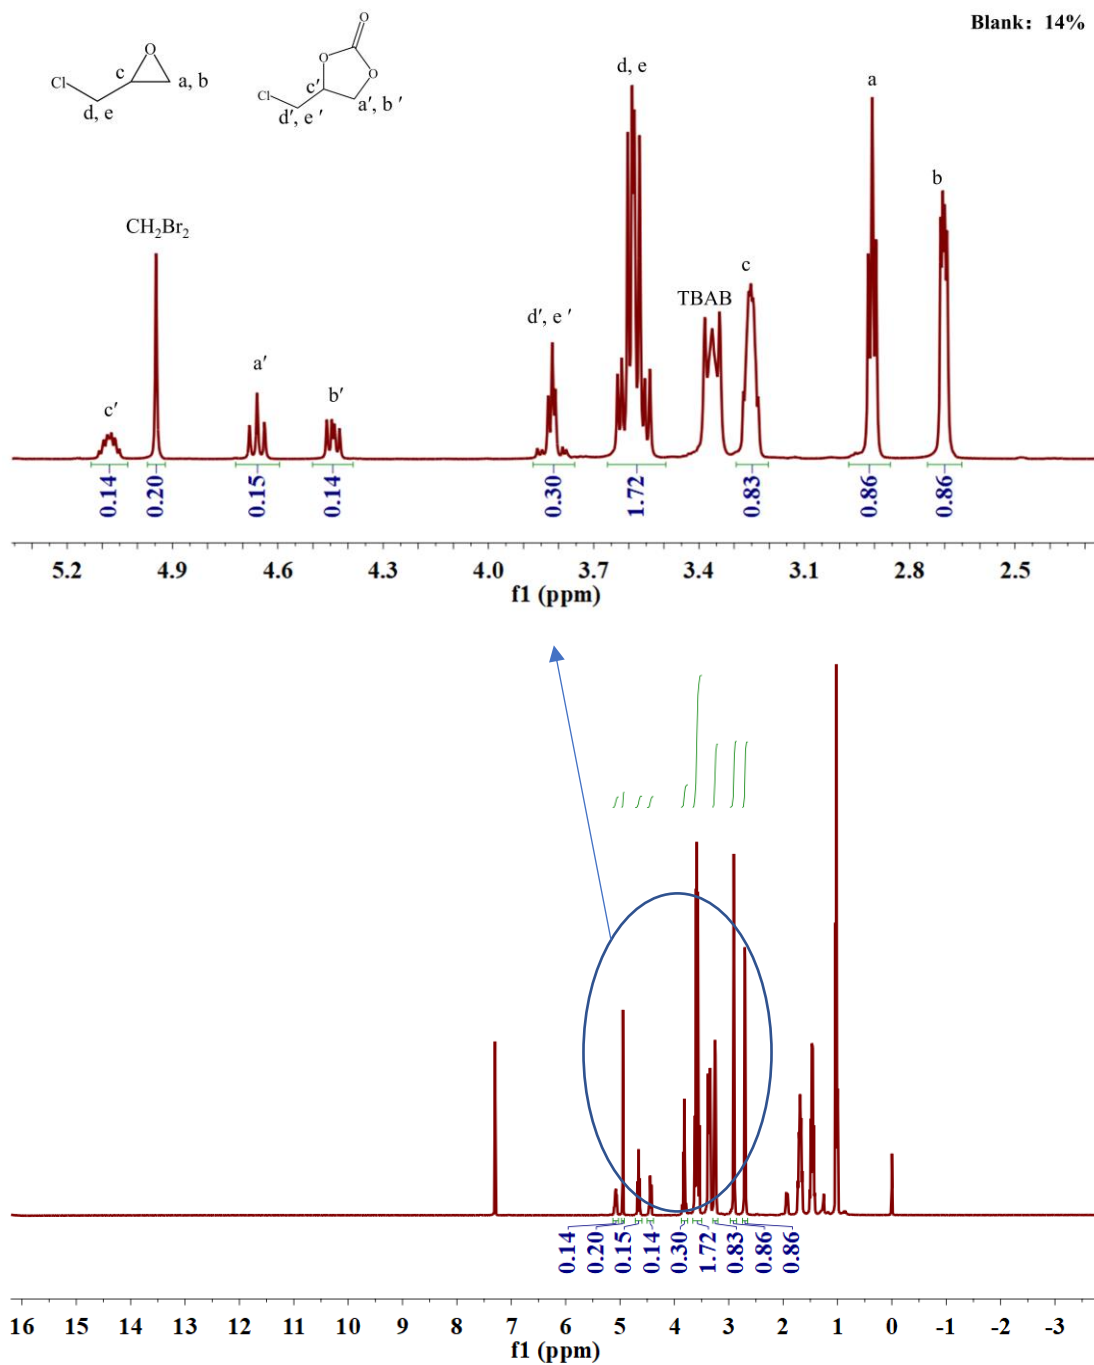

**Figure S30**  $^1\text{H}$  NMR spectra after 24 h  $\text{CO}_2$  cycloaddition reaction of epichlorohydrin with TBAB as catalyst.

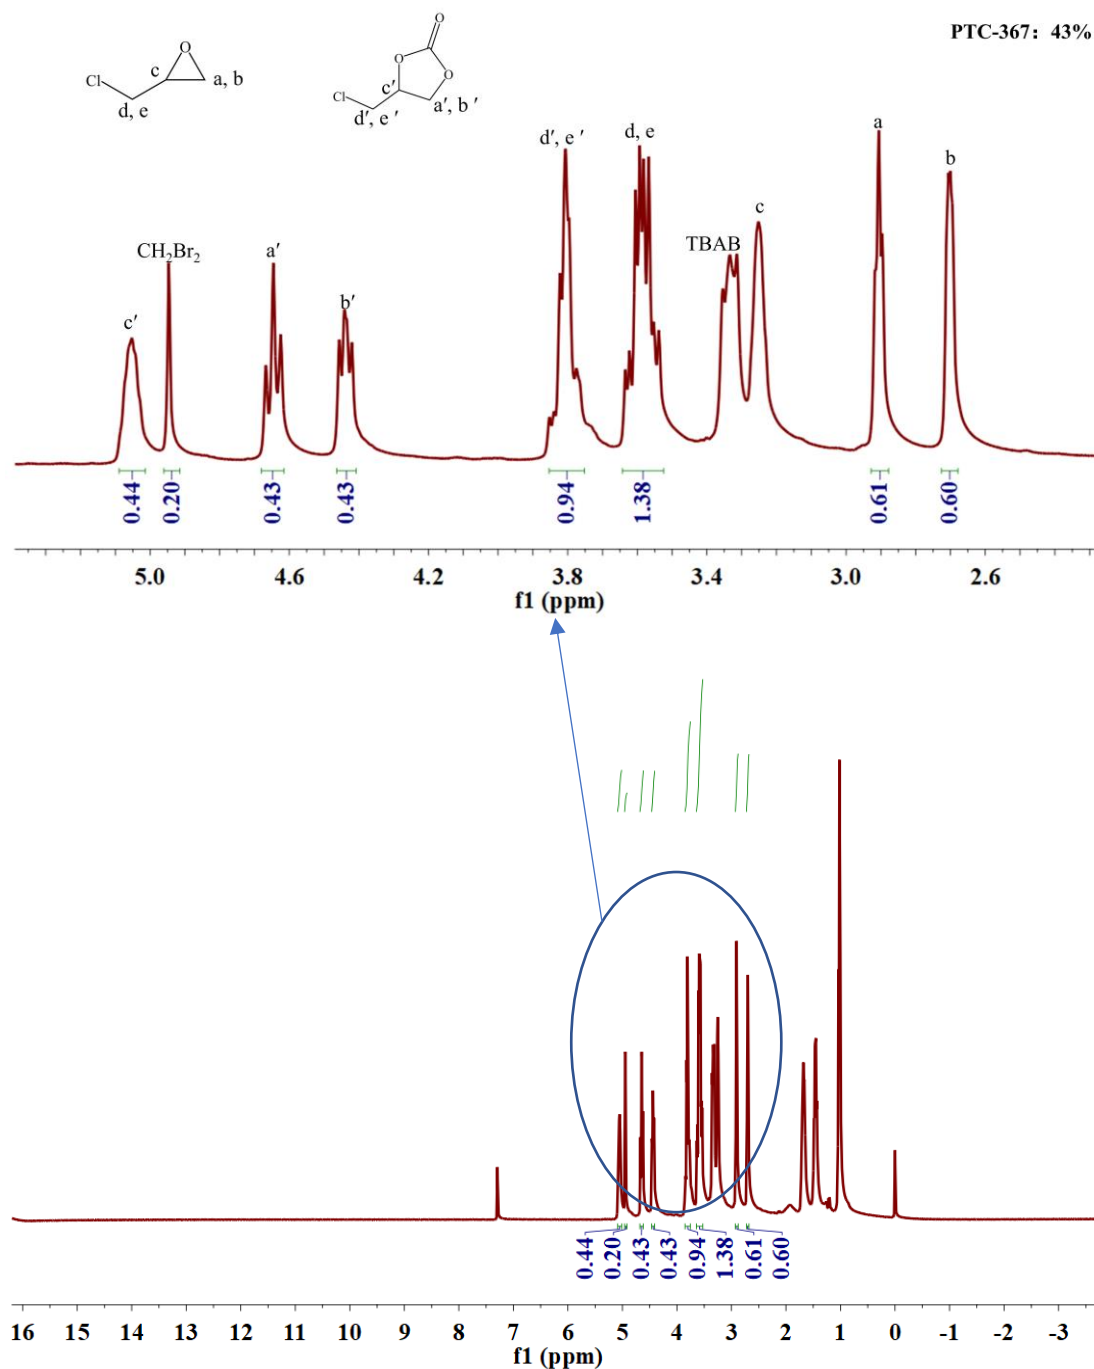

**Figure S31**  $^1\text{H}$  NMR spectra after 24 h  $\text{CO}_2$  cycloaddition reaction of epichlorohydrin with **PTC-367** and TBAB as co-catalyst.

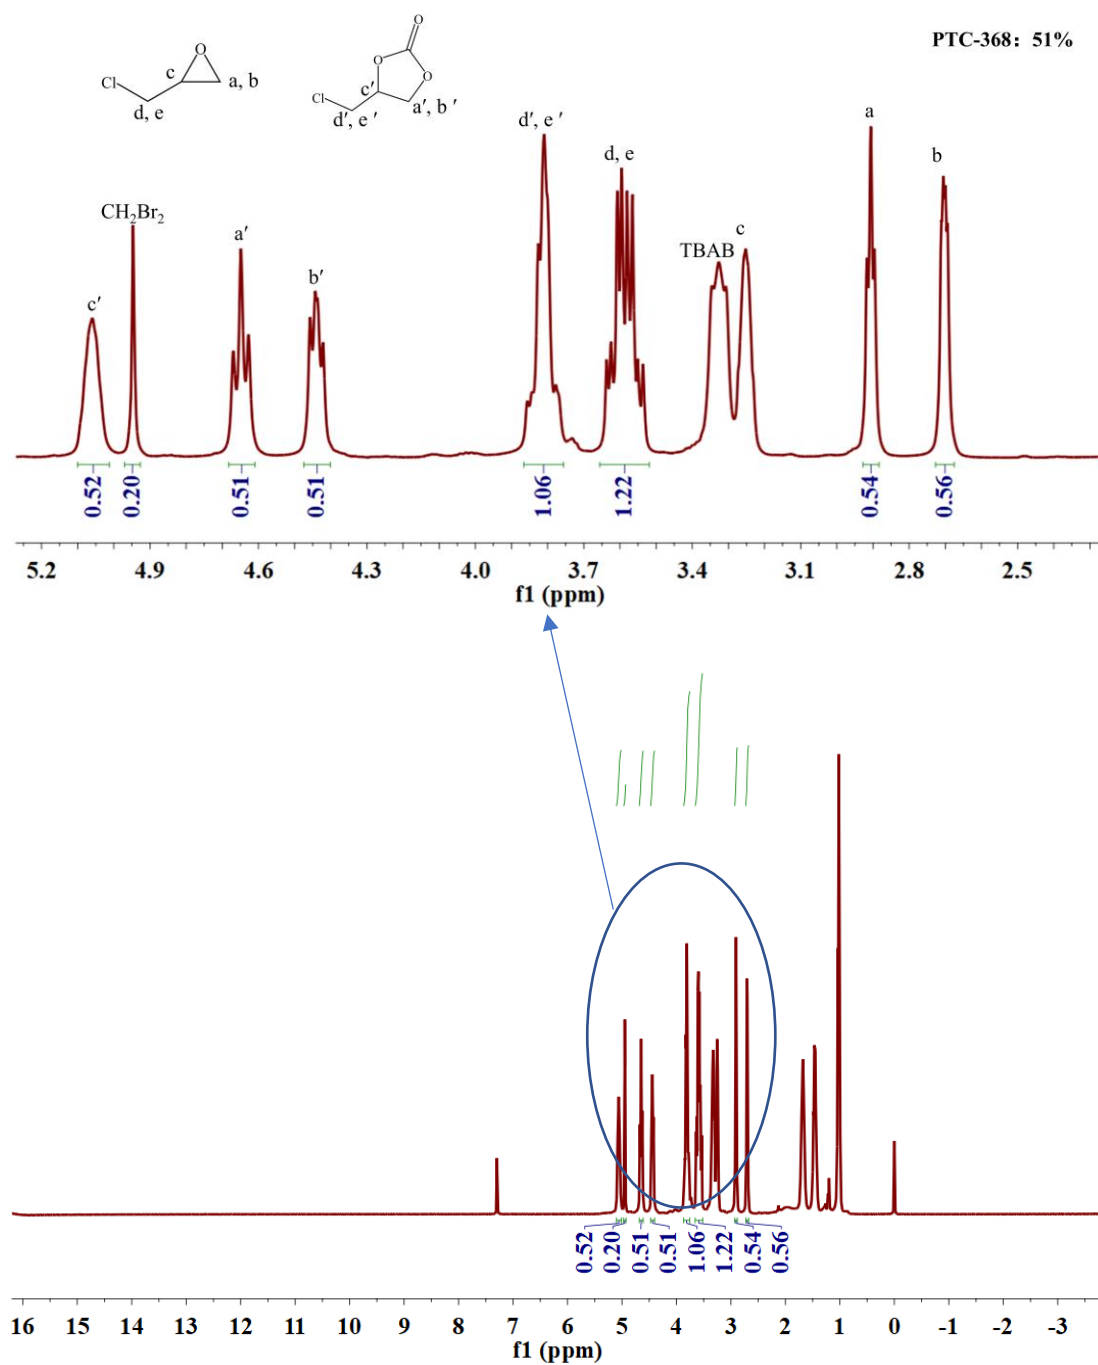

**Figure S32** <sup>1</sup>H NMR spectra after 24 h CO<sub>2</sub> cycloaddition reaction of epichlorohydrin with **PTC-368** and TBAB as co-catalyst.

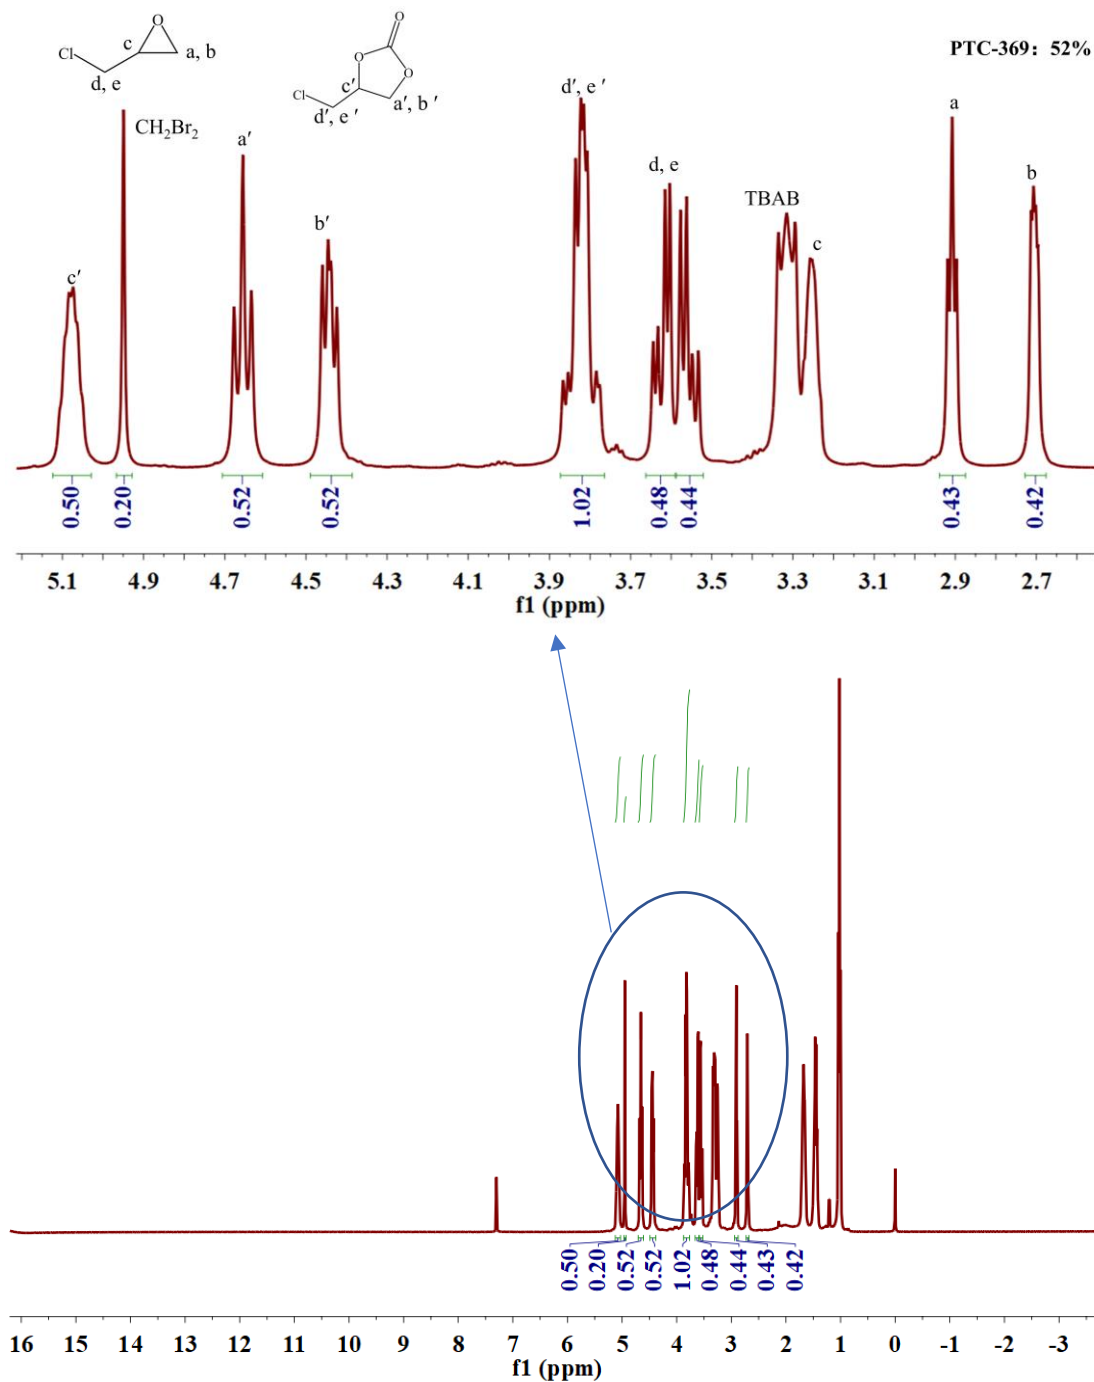

**Figure S33** <sup>1</sup>H NMR spectra after 24 h CO<sub>2</sub> cycloaddition reaction of epichlorohydrin with **PTC-369** and TBAB as co-catalyst.

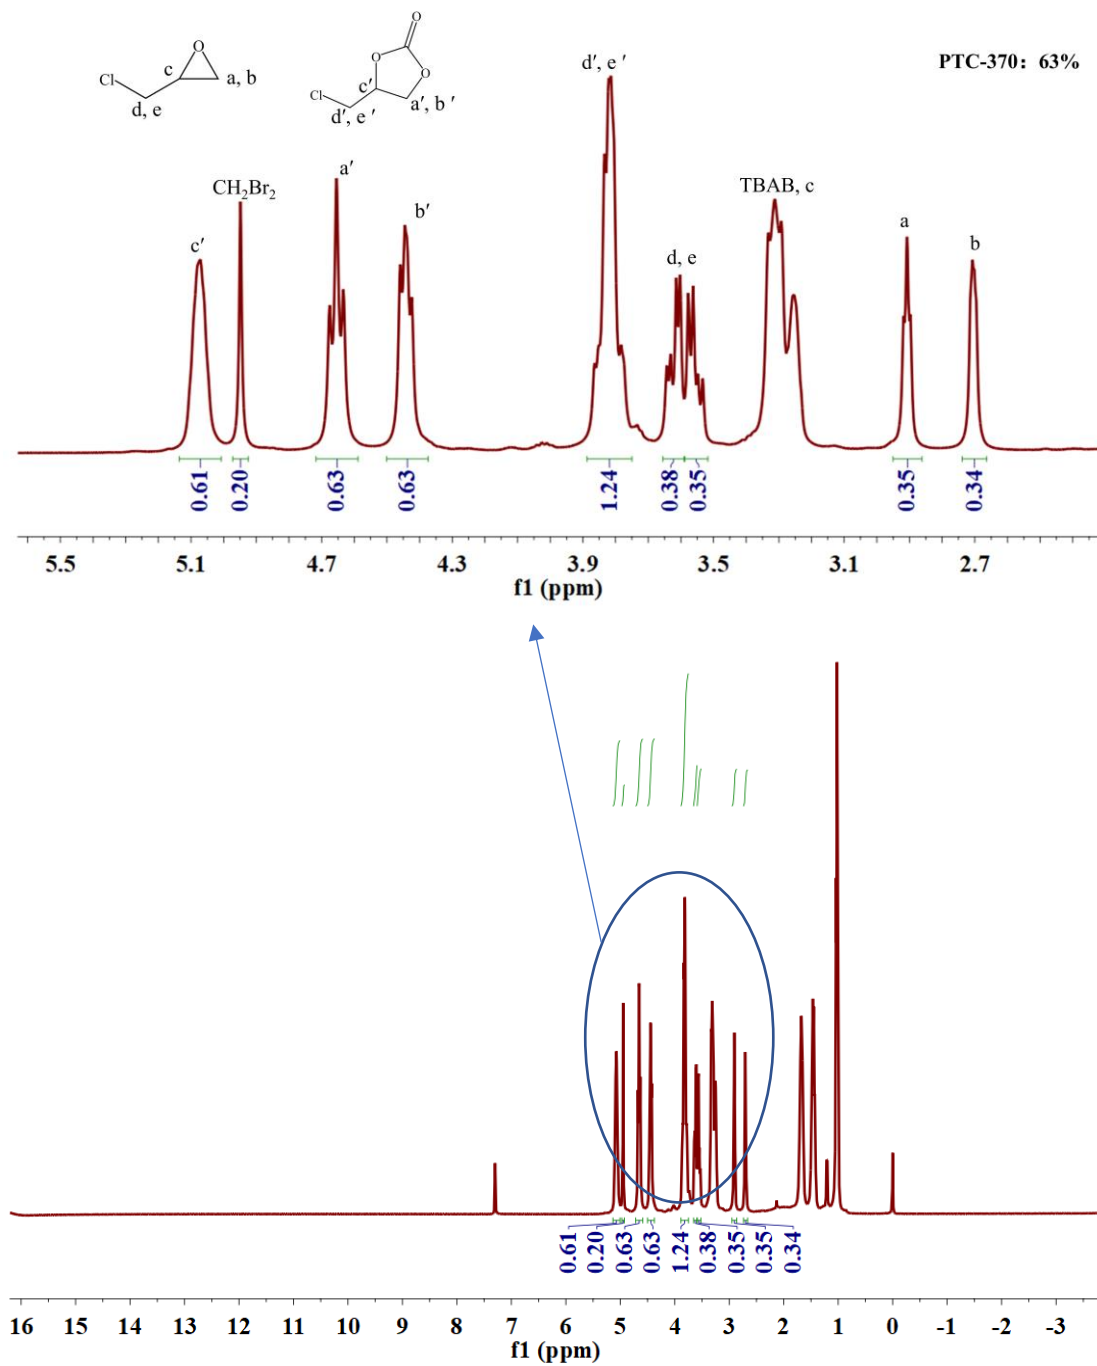

**Figure S34** <sup>1</sup>H NMR spectra after 24 h CO<sub>2</sub> cycloaddition reaction of epichlorohydrin with **PTC-370** and TBAB as co-catalyst.

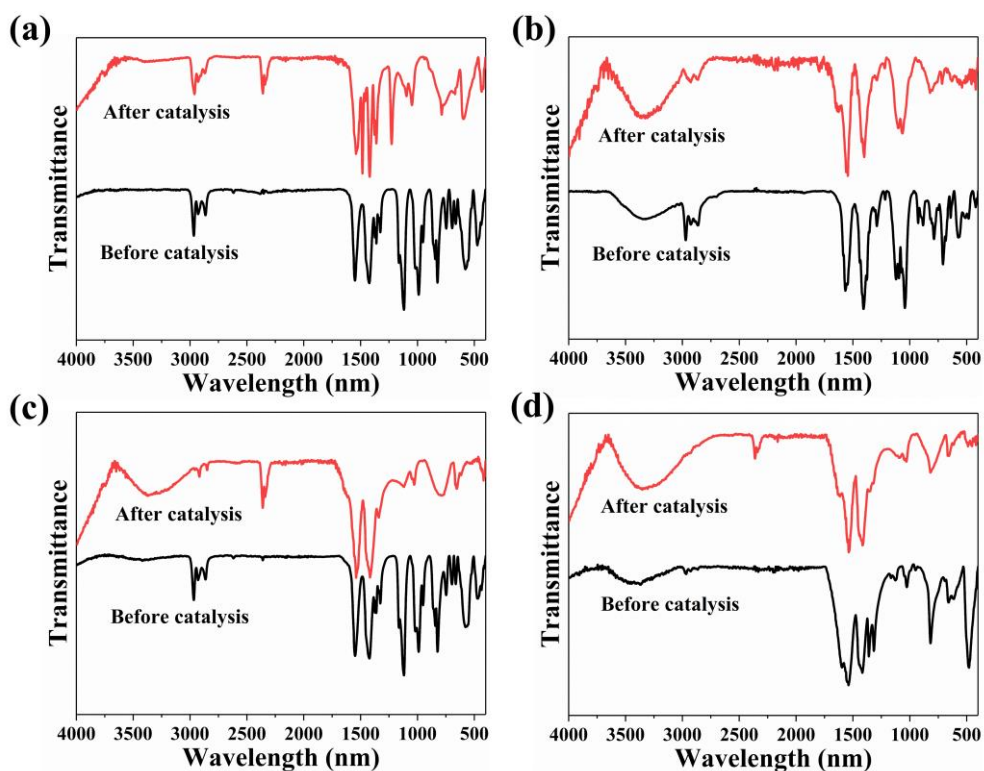

**Figure S 35** The solid-state IR spectra of (a) **PTC-367** to (d) **PTC-370** before and after catalytic reaction (powdered crystals were saturated and precipitated after several weeks of standing).

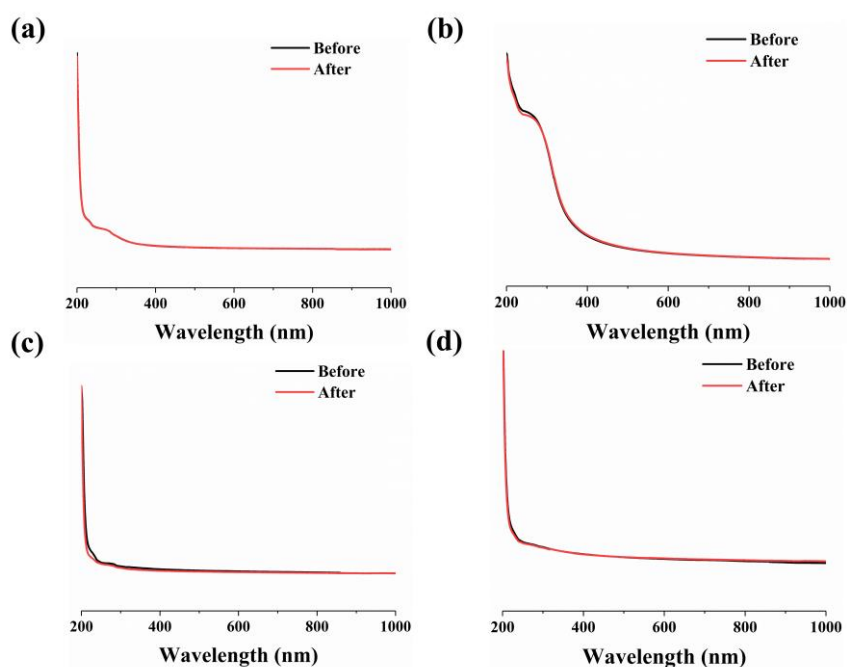

**Figure S 36** The solution-state UV-Vis spectra of (a) **PTC-367** to (d) **PTC-370** before and after catalytic reaction.
